# Supplementary material for: Evaluation of pathogenicity of Salmonella Gallinarum strains harbouring deletions in genes whose orthologues are conserved pseudogenes in S. Pullorum
Source: PubMed Central journal article supplement (PMC6054384; doi:10.1371/journal.pone.0200585), 2018-07-20

**S1 File. Exponential curves, equations and coefficients of determination (R2) extracted from the bacterial growth in D-gluconate**

| Time | SG287/91-1 | SG287/91-2 | SG287/91-3 |
|------|------------|------------|------------|
| 2    | 0,076      | 0,069      | 0,071      |
| 3    | 0,109      | 0,109      | 0,105      |
| 4    | 0,168      | 0,173      | 0,152      |
| 5    | 0,225      | 0,232      | 0,224      |

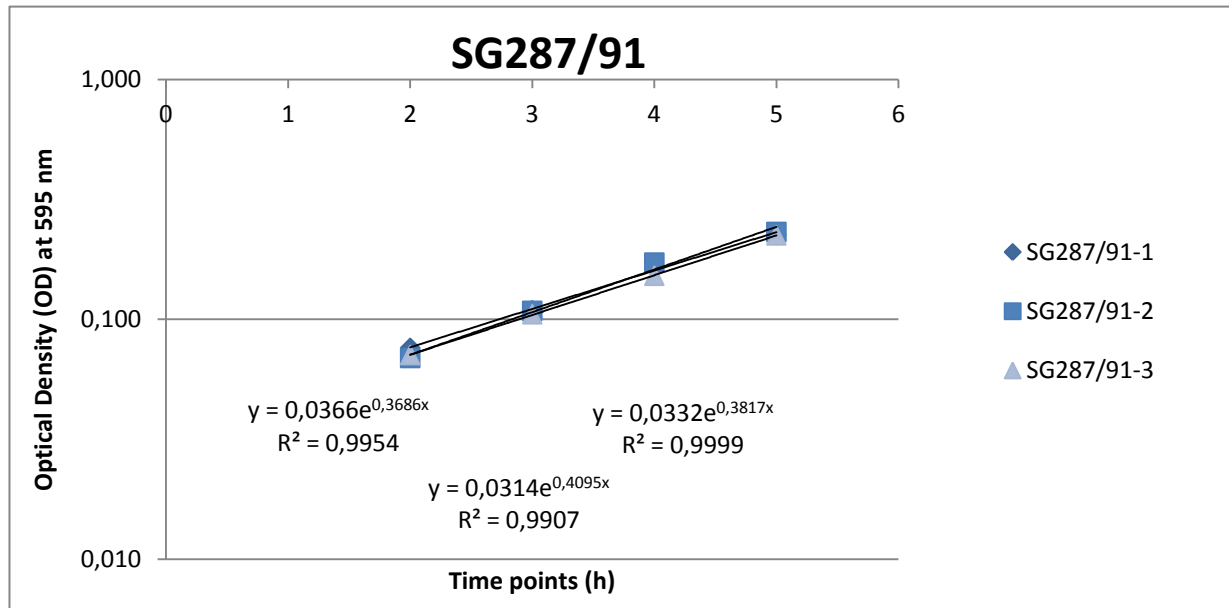

| Time | SGΔccmH-1 | SGΔccmH-2 | SGΔccmH-3 |
|------|-----------|-----------|-----------|
| 2    | 0,071     | 0,073     | 0,071     |
| 3    | 0,111     | 0,110     | 0,103     |
| 4    | 0,145     | 0,142     | 0,144     |
| 5    | 0,242     | 0,232     | 0,213     |

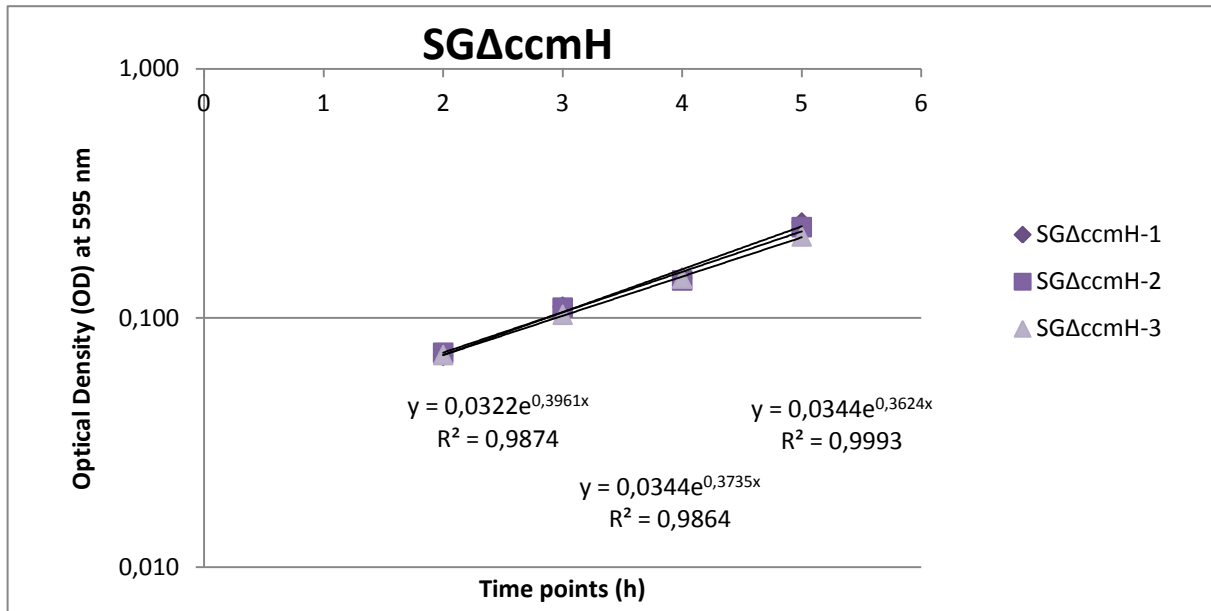

| Time | SGΔccmHidnTO-1 | SGΔccmHidnTO-2 | SGΔccmHidnTO-3 |
|------|----------------|----------------|----------------|
| 2    | 0,071          | 0,070          | 0,072          |
| 3    | 0,110          | 0,105          | 0,105          |
| 4    | 0,152          | 0,147          | 0,145          |
| 5    | 0,217          | 0,203          | 0,214          |

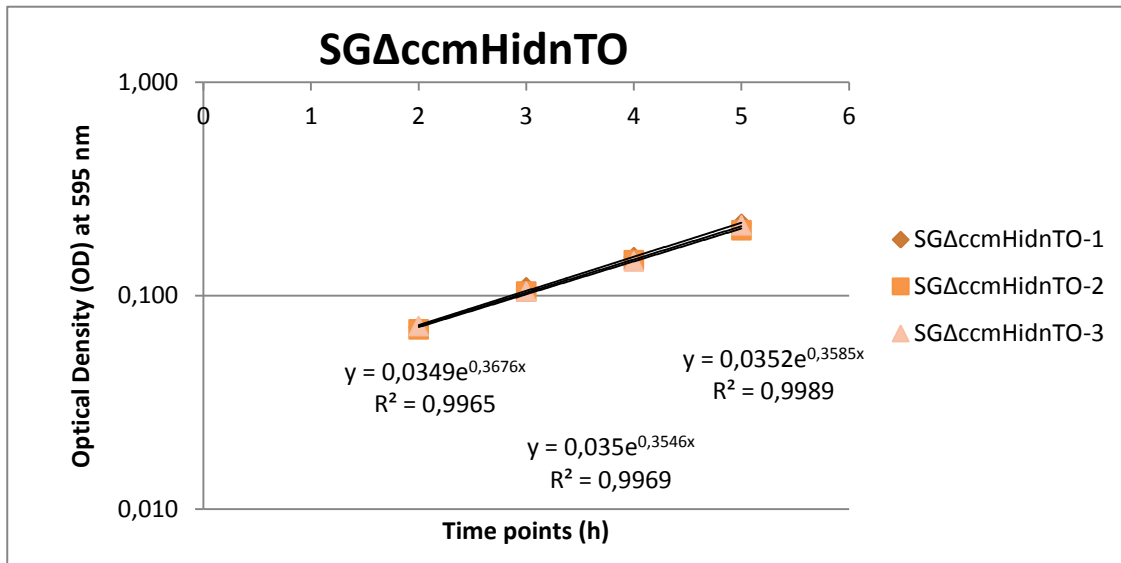

| Time | SGΔidnTO-1 | SGΔidnTO-2 | SGΔidnTO-3 |
|------|------------|------------|------------|
| 2    | 0,068      | 0,066      | 0,070      |
| 3    | 0,108      | 0,105      | 0,101      |
| 4    | 0,157      | 0,162      | 0,146      |
| 5    | 0,233      | 0,238      | 0,218      |

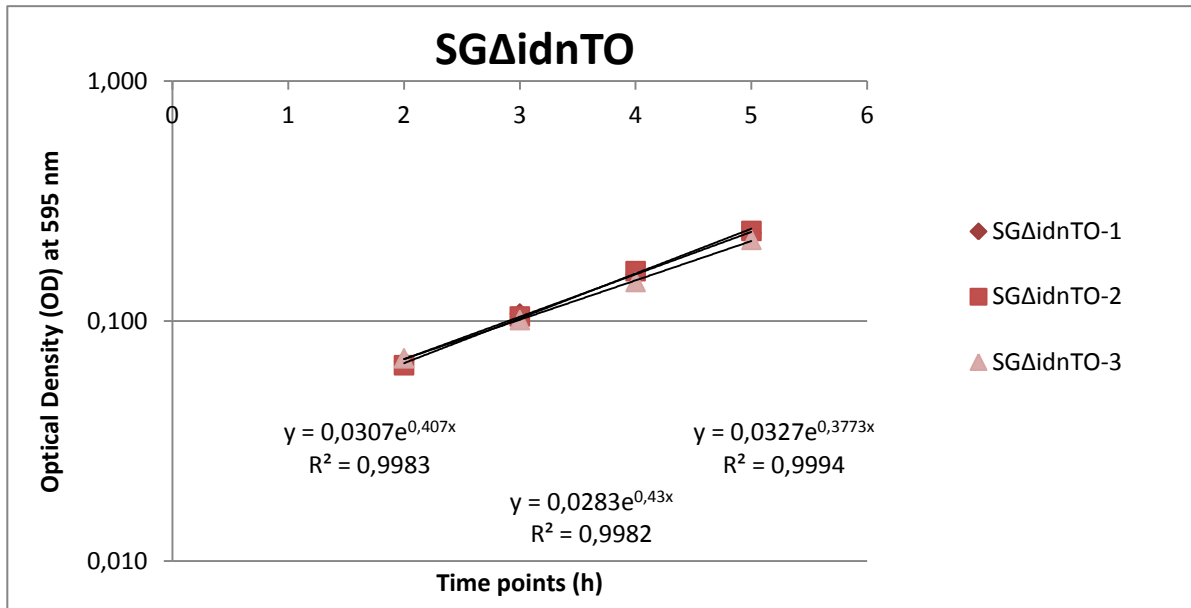

Supplement: pone.0200585.s004.pdf [file pone.0200585.s004.pdf]
