# Supplementary material for: Evaluation of pathogenicity of Salmonella Gallinarum strains harbouring deletions in genes whose orthologues are conserved pseudogenes in S. Pullorum
Source: PubMed Central journal article supplement (PMC6054384; doi:10.1371/journal.pone.0200585), 2018-07-20
Supplement: pone.0200585.s005.pdf [file pone.0200585.s005.pdf]

S2 File. Alignment of *idnT* CDS from *S. Gallinarum* strains 287/91 (SG287\_91) and 9184 (SG9184), and *S. Pullorum* strains CDC1983-67 (SPCDC) and RKS5078 (SPRKS).

```

                20                                40
SG287_91_idnT  GTGGTGGGATTTGCCGAAGGGATGGGCGCGCAAGACGTCCTGCACTCCATACAAAACGG 59
SG9184_idnT   GTGGTGGGATTTGCCGAAGGGATGGGCGCGCAAGACGTCCTGCACTCCATACAAAACGG 59
SPCDC_idnT-RC -----
SPRKS-idnT-RC -----

        60                                80                                100
SG287_91_idnT  AATTGGCGGTA CTCTGGGCGGACTCGCCATGATCCTCGGTTTTGGCGCGATGCTGGGAA 118
SG9184_idnT   AATTGGCGGTA CTCTGGGCGGACTCGCCATGATCCTCGGTTTTGGCGCGATGCTGGGAA 118
SPCDC_idnT-RC -----
SPRKS-idnT-RC -----

        120                                140                                160
SG287_91_idnT  GATTAATTTCCGATACCGGCGCCGCGCAGCGCATTGCGACGACGCTCATTAAATACGTTTC 177
SG9184_idnT   GATTAATTTCCGATACCGGCGCCGCGCAGCGCATTGCGACGACGCTCATTAAATACGTTTC 177
SPCDC_idnT-RC -----
SPRKS-idnT-RC -----

        180                                200                                220
SG287_91_idnT  GGCAAAAACGCGTGCAATGGGCGCTGGTGATCACCGGGCTTATCGTCGGCCTGGCAAT 236
SG9184_idnT   GGCAAAAACGCGTGCAATGGGCGCTGGTGATCACCGGGCTTATCGTCGGCCTGGCAAT 236
SPCDC_idnT-RC -----
SPRKS-idnT-RC -----

        240                                260                                280
SG287_91_idnT  GTTTTTTGAAGTCGGATTCGTA CTGCTGTTGCCGCTCGTTTTTACGATTGTGGCCTCAT 295
SG9184_idnT   GTTTTTTGAAGTCGGATTCGTA CTGCTGTTGCCGCTCGTTTTTACGATTGTGGCCTCAT 295
SPCDC_idnT-RC -----
SPRKS-idnT-RC -----

        300                                320                                340
SG287_91_idnT  CGGGACTGCCCTTGCTGTATGTCGGGGTTCCAATGGTCGCCGCCTTATCCGTTACGCAC 354
SG9184_idnT   CGGGACTGCCCTTGCTGTATGTCGGGGTTCCAATGGTCGCCGCCTTATCCGTTACGCAC 354
SPCDC_idnT-RC -----
SPRKS-idnT-RC -----

        360                                380                                400
SG287_91_idnT  TGCTTCCTGCCGCCGCA TCCCGGCCCTACCGCTATTGCGACAATTTTTGAGGCAAATCT 413
SG9184_idnT   TGCTTCCTGCCGCCGCA TCCCGGCCCTACCGCTATTGCGACAATTTTTGAGGCAAATCT 413
SPCDC_idnT-RC -----
SPRKS-idnT-RC -----

        420                                440                                460
SG287_91_idnT  CGGTACGACCCTGCTGTATGGGTTAATCATTACCATACCGACCGTGATTGTTGCCGGCC 472
SG9184_idnT   CGGTACGACCCTGCTGTATGGGTTAATCATTACCATACCGACCGTGATTGTTGCCGGCC 472
SPCDC_idnT-RC -----
SPRKS-idnT-RC -----

        480                                500                                520
SG287_91_idnT  CGCTGTTTTCAA AATTGCTGGCGCGCTTTGAGAAAGCGCCGCCTGAAGGATTATTTAAT 531
SG9184_idnT   CGCTGTTTTCAA AATTGCTGGCGCGCTTTGAGAAAGCGCCGCCTGAAGGATTATTTAAT 531
SPCDC_idnT-RC -----
SPRKS-idnT-RC -----

        540                                560                                580
SG287_91_idnT  CCTCATCTATT CAGTGAAGAAGAGATGCCGTCATTCTGGAACAGTATTTTTGCCGCCGT 590
SG9184_idnT   CCTCATCTATT CAGTGAAGAAGAGATGCCGTCATTCTGGAACAGTATTTTTGCCGCCGT 590
SPCDC_idnT-RC -----
SPRKS-idnT-RC -----

```

|               |                                                              |       |       |  |
|---------------|--------------------------------------------------------------|-------|-------|--|
|               | 600                                                          | 620   | 640   |  |
| SG287_91_idnT | GATCCCGGTCATTCTGATGGCCATCGCAGCGGTATGTGAAATCACGCTGCCAAAAACGA  | 649   |       |  |
| SG9184_idnT   | GATCCCGGTCATTCTGATGGCCATCGCAGCGGTATGTGAAATCACGCTGCCAAAAACGA  | 649   |       |  |
| SPCDC_idnT-RC | -----CGCAGCGGTATGTGAAATCACGCTGCCAAAAACGA                     | 35    |       |  |
| SPRKS_idnT-RC | -----CGCAGCGGTATGTGAAATCACGCTGCCAAAAACGA                     | 35    |       |  |
|               | 660                                                          | 680   | 700   |  |
| SG287_91_idnT | ATGCCGTGCGGGTTTTCTTCGAATTTATCGGTAATCCAGCAGTGGCGTTGTTTATTGCC  | 708   |       |  |
| SG9184_idnT   | ATGCCGTGCGGGTTTTCTTCGAATTTATCGGTAATCCAGCAGTGGCGTTGTTTATTGCC  | 708   |       |  |
| SPCDC_idnT-RC | ATGCCGTGCGGGTTTTCTTCGAATTTATCGGTAATCCAGCAGTGGCGTTGTTTATTGCC  | 94    |       |  |
| SPRKS_idnT-RC | ATGCCGTGCGGGTTTTCTTCGAATTTATCGGTAATCCAGCAGTGGCGTTGTTTATTGCC  | 94    |       |  |
|               | 720                                                          | 740   | 760   |  |
| SG287_91_idnT | ATTATCATCGCCATTTTTACGCTGGGCCGACGCAACGGACGTACGGTTGAGCAGGTGAT  | 767   |       |  |
| SG9184_idnT   | ATTATCATCGCCATTTTTACGCTGGGCCGACGCAACGGACGTACGGTTGAGCAGGTGAT  | 767   |       |  |
| SPCDC_idnT-RC | ATTATCATCGCCATTTTTACGCTGGGCCGACGCAACGGACGTACGGTTGAGCAGGTGAT  | 153   |       |  |
| SPRKS_idnT-RC | ATTATCATCGCCATTTTTACGCTGGGCCGACGCAACGGACGTACGGTTGAGCAGGTGAT  | 153   |       |  |
|               | 780                                                          | 800   | 820   |  |
| SG287_91_idnT | GGATATCGTTCGGCGAGTCCATTGGCGCTATTGCGATGATTGTTTTATCATCGCGGGCG  | 826   |       |  |
| SG9184_idnT   | GGATATCGTTCGGCGAGTCCATTGGCGCTATTGCGATGATTGTTTTATCATCGCGGGCG  | 826   |       |  |
| SPCDC_idnT-RC | GGATATCGTTCGGCGAGTCCATTGGCGCTATTGCGATGATTGTTTTATCATCGCGGGCG  | 212   |       |  |
| SPRKS_idnT-RC | GGATATCGTTCGGCGAGTCCATTGGCGCTATTGCGATGATTGTTTTATCATCGCGGGCG  | 212   |       |  |
|               | 840                                                          | 860   | 880   |  |
| SG287_91_idnT | GCGGCGCGTTTTAAACAAGTGCTGGTGGATAGCGGCGTGGGCCAATATATCTCGCAATTA | 885   |       |  |
| SG9184_idnT   | GCGGCGCGTTTTAAACAAGTGCTGGTGGATAGCGGCGTGGGCCAATATATCTCGCAATTA | 885   |       |  |
| SPCDC_idnT-RC | GCGGCGCGTTTTAAACAAGTGCTGGTGGATAGCGGCGTGGGCCAATATATCTCGCAATTA | 271   |       |  |
| SPRKS_idnT-RC | GCGGCGCGTTTTAAACAAGTGCTGGTGGATAGCGGCGTGGGCCAATATATCTCGCAATTA | 271   |       |  |
|               | 900                                                          | 920   | 940   |  |
| SG287_91_idnT | ATGACCGGCACCTCGCTATCTCCGTTATTAATGTGCTGGACGGTAGCCGCCGTGCTGCG  | 944   |       |  |
| SG9184_idnT   | ATGACCGGCACCTCGCTATCTCCGTTATTAATGTGCTGGACGGTAGCCGCCGTGCTGCG  | 944   |       |  |
| SPCDC_idnT-RC | ATGACCGGCACCTCGCTATCTCCGTTATTAATGTGCTGGACGGTAGCCGCCGTGCTGCG  | 330   |       |  |
| SPRKS_idnT-RC | ATGACCGGCACCTCGCTATCTCCGTTATTAATGTGCTGGACGGTAGCCGCCGTGCTGCG  | 330   |       |  |
|               | 960                                                          | 980   | 1,000 |  |
| SG287_91_idnT | TATTGCGTTAGGTTCCGCGACCGTGGCCGCGATAACCACAGCGGGCGTCGTATTGCCGA  | 1003  |       |  |
| SG9184_idnT   | TATTGCGTTAGGTTCCGCGACCGTGGCCGCGATAACCACAGCGGGCGTCGTATTGCCGA  | 1003  |       |  |
| SPCDC_idnT-RC | TATTGCGTTAGGTTCCGCGACCGTGGCCGCGATAACCACAGCGGGCGTCGTATTGCCGA  | 389   |       |  |
| SPRKS_idnT-RC | TATTGCGTTAGGTTCCGCGACCGTGGCCGCGATAACCACAGCGGGCGTCGTATTGCCGA  | 389   |       |  |
|               | 1,020                                                        | 1,040 | 1,060 |  |
| SG287_91_idnT | TTATTAACGTAACCCACGCCGATCCGGCGTTAATGGTACTGGCGACAGGCGCGGGAAGC  | 1062  |       |  |
| SG9184_idnT   | TTATTAACGTAACCCACGCCGATCCGGCGTTAATGGTACTGGCGACAGGCGCGGGAAGC  | 1062  |       |  |
| SPCDC_idnT-RC | TTATTAACGTAACCCACGCCGATCCGGCGTTAATGGTACTGGCGACAGGCGCGGGAAGC  | 448   |       |  |
| SPRKS_idnT-RC | TTATTAACGTAACCCACGCCGATCCGGCGTTAATGGTACTGGCGACAGGCGCGGGAAGC  | 448   |       |  |
|               | 1,080                                                        | 1,100 | 1,120 |  |
| SG287_91_idnT | GTTATTGCATCACATGTTAACGATCCCGTTTTTGGCTGTTTAAAGGGTATTTTAATCT   | 1121  |       |  |
| SG9184_idnT   | GTTATTGCATCACATGTTAACGATCCCGTTTTTGGCTGTTTAAAGGGTATTTTAATCT   | 1121  |       |  |
| SPCDC_idnT-RC | GTTATTGCATCACATGTTAACGATCCCGTTTTTGGCTGTTTAAAGGGTATTTTAATCT   | 507   |       |  |
| SPRKS_idnT-RC | GTTATTGCATCACATGTTAACGATCCCGTTTTTGGCTGTTTAAAGGGTATTTTAATCT   | 507   |       |  |
|               | 1,140                                                        | 1,160 | 1,180 |  |
| SG287_91_idnT | TAGCGTTCGGGGAAACCCTACGTACCTGGACCGTTATGGAAACATTGATTTCTGTCATGG | 1180  |       |  |
| SG9184_idnT   | TAGCGTTCGGGGAAACCCTACGTACCTGGACCGTTATGGAAACATTGATTTCTGTCATGG | 1180  |       |  |
| SPCDC_idnT-RC | TAGCGTTCGGGGAAACCCTACGTACCTGGACCGTTATGGAAACATTGATTTCTGTCATGG | 566   |       |  |
| SPRKS_idnT-RC | TAGCGTTCGGGGAAACCCTACGTACCTGGACCGTTATGGAAACATTGATTTCTGTCATGG | 566   |       |  |
|               | 1,200                                                        | 1,220 |       |  |
| SG287_91_idnT | GGTACTGGGCGTACTGGCGCTGAATGCGGTTCTGCATTAA                     | 1221  |       |  |
| SG9184_idnT   | GGTACTGGGCGTACTGGCGCTGAATGCGGTTCTGCATTAA                     | 1221  |       |  |
| SPCDC_idnT-RC | GGTACTGGGCGTACTGGCGCTGAATGCGGTTCTGCATTAA                     | 607   |       |  |
| SPRKS_idnT-RC | GGTACTGGGCGTACTGGCGCTGAATGCGGTTCTGCATTAA                     | 607   |       |  |
